# Supplementary material for: The Role of Sleep Quality, Trait Anxiety and Hypothalamic-Pituitary-Adrenal Axis Measures in Cognitive Abilities of Healthy Individuals
Source: Int J Environ Res Public Health. 2020 Oct 19;17(20):7600. doi: 10.3390/ijerph17207600 (PMC7589840; doi:10.3390/ijerph17207600)
Supplement: Supplementary file 1 [file ijerph-17-07600-s001.zip]

Archive with 8 entries (8 files):
- ijerph-924800-supplementary/BoxS1_Sleep_Cognition_HPA.pdf
- ijerph-924800-supplementary/FigureS1_Sleep_Cognition_HPA.pdf
- ijerph-924800-supplementary/FigureS2_Sleep_Cognition_HPA.pdf
- ijerph-924800-supplementary/FigureS3_Sleep_Cognition_HPA.pdf
- ijerph-924800-supplementary/TableS1_Sleep_Cognition_HPA.docx
- ijerph-924800-supplementary/TableS2_Sleep_Cognition_HPA.docx
- ijerph-924800-supplementary/TableS3_Sleep_Cognition_HPA.docx
- ijerph-924800-supplementary/TableS4_Sleep_Cognition_HPA.docx
